# Supplementary material for: Mesomorphism of a new series of catanionic 4-(1-pentylheptyl)benzenesulfonates
Source: Royal Society of Chemistry journal article supplement (doi:10.1039/c4sm01356e), 2014-07-25
Supplement: c4sm01356e1.pdf [file c4sm01356e1.pdf]

## **Supplementary Data**

### **Electronic Supplementary Information**

#### **Video, Sample 5 sheared at 175 deg.wmv**

The black texture of compound **5** between crossed polarizers is homeotropic, as confirmed by simple shearing experiment, and shown by a short video. As the cover slip is sheared or pressed the texture brightens up and after the shear the brightness decays within a few seconds.

**Keywords:** smectic phase, homeotropic alignment, polarizing optical microscopy, liquid crystalline molecules
